# Supplementary material for: Peste des petits ruminants Virus Transmission Scaling and Husbandry Practices That Contribute to Increased Transmission Risk: An Investigation among Sheep, Goats, and Cattle in Northern Tanzania
Source: Viruses. 2020 Aug 24;12(9):930. doi: 10.3390/v12090930 (PMC7552010; doi:10.3390/v12090930)
Supplement: Supplementary file 1 [file viruses-12-00930-s001.zip › Herzogetal2020_Supplement2_StudyQuestionnaire_subset.xlsx]

## Sheet: Sheet1
variable_name	question	options	variableusedinwhichsection
production system type	See Methods (not asked in survey)	Agropastoral, Pastoral Agropastoral, Pastoral, Smallholder	Methods
village, subvillage, household id	See Methods (not asked in survey - given to serosurvey results and matched to survey based on household ID)	(number)	Methods
.hh_id	[generated - cleaned hh_id]	(number)	Methods
hh_id	Enter household ID [Ingiza utambulisho wa kaya]	(number)	Methods
lang	Language [Lugha]	Kiswahili, English, Masaai	Methods
hh_number	How many different households are in this compound? [Kuna kaya ngapi katika boma hili?]	(number)	Methods
hhh_sex	What is the head of household's gender [Jinsia ya mkuu wa kaya]?	Male, Female	Table 2
hhh_tribe	What is your (head of household) tribe [Kabila lako ni lipi]?	Arusha, Masaai, Barabaig, Chagga, Iraqw, Pare, Sambaa, Other	Table 2
hhh_tribe_other	Specify other [Mwingine, bainisha]:	(free text)	Table 2
res_hhh_ed	What is the highest level of education of the head of the household [Kiwango cha juu cha elimu cha mkuu wa kaya]?	No formal, Some primary, Completed primary, Some secondary, completed secondary, post secondary, Some university, University completed, Post graduate	Table 2
hh_crops	Were any crops grown by members of this household during the last 12 months [Kuna mazao yeyote yalioteshwa na watu wa kaya hili katika miezi 12 iliyopita]?	Yes, No	Table 2
vaccine	Have any animals in your herd been vaccinated in the past 24 months [Je, kuna wanyama katika kundi wamepata chanjo katika kipindi cha miezi 24 iliyopita]?	Yes, No	Methods
vaccine_which	Against which diseases [Ni chanjo dhidi ya magonjwa gani]?	CBPP, Anthrax, FMD, LSD, RVF, Sheep pox, Goatpox, Other	Methods
vaccine_other	Specify other [Vinginevyo (ainisha)]:	(free text)	Methods
cattle	Are any cattle currently kept at this compound [Je, kuna ng'ombe wowote wanafugwa kwenye boma hili kwa sasa]?	Yes, No	Figures 2, 3, S7
cattle_number	What is the total number of cattle that are managed together at this compound [Kuna jumla ya ng'ombe wangapi wanaotunzwa pamoja katika boma hili]?	(number)	Figures 2, 3, S7
cattle_number_adultmale	Of the ${cattle_number} cattle managed together in this compound, how many are adult males [Kati ya ng'ombe ${cattle_number} wanaotunzwa pamoja kwenye boma hili, ni wangapi madume wakubwa]?	(number)	Figures 2, 3, S7
cattle_number_adultfemale	Of the ${cattle_number} cattle managed together in this compound, how many are adult females [Kati ya ${cattle_number} ng'ombe wanaotunzwa pamoja kwenye boma hili, ni wangapi ni majike wakubwa]?	(number)	Figures 2, 3, S7
cattle_number_juvenile	Of the ${cattle_number} cattle managed together in this compound, how many are juveniles [Kati ya ${cattle_number} ng'ombe wanaotunzwa pamoja kwenye boma hili, ni wangapi wadogo]?	(number)	Figures 2, 3, S7
cattle_number_hh	Of the ${cattle_number} cattle currently managed together in this compound, how many are owned by your household [Kati ya ${cattle_number} ng'ombe wanaotunzwa pamoja kwa sasa katika boma hili, wangapi wanamilikiwa na kaya yako]?	(number)	Figures 2, 3, S7
goats	Are any goats currently kept at this compound [Je, kuna mbuzi wowote wanafugwa kwenye boma hili kwa sasa]?	Yes, No	Figures 2, 3, S7
goats_number	What is the total number of goats that are managed together at this compound [Kuna jumla ya mbuzi wangapi wanaotunzwa pamoja katika boma hili]?	(number)	Figures 2, 3, S7
goats_number_adultmale	Of the ${goats_number} goats managed together at this compound, how many are adult males [Kati ya mbuzi ${goats_number} wanaotunzwa pamoja kwenye boma hili, ni wangapi madume wakubwa]?	(number)	Figures 2, 3, S7
goats_number_adultfemale	Of the ${goats_number} goats managed together at this compound, how many are adult females [Kati ya ${goats_number} mbuzi wanaotunzwa pamoja kwenye boma hili, ni wangapi ni majike wakubwa]?	(number)	Figures 2, 3, S7
goats_number_juvenile	Of the ${goats_number} goats managed together at this compound, how many are juveniles [Kati ya ${goats_number} mbuzi wanaotunzwa pamoja kwenye boma hili, ni wangapi wadogo]?	(number)	Figures 2, 3, S7
goats_number_hh	Of the ${goats_number} goats currently managed together at this compound, how many are owned by your household [Kati ya ${goats_number} mbuzi wanaotunzwa pamoja kwa sasa katika boma hili, wangapi wanamilikiwa na kaya yako]?	(number)	Figures 2, 3, S7
sheep	Are any sheep currently kept at this compound [Je, kuna kondoo wowote wanafugwa kwenye boma hili kwa sasa]?	Yes, No	Figures 2, 3, S7
sheep_number	What is the total number of sheep that are managed together at this compound [Kuna jumla ya kondoo wangapi wanaotunzwa pamoja katika boma hili]?	(number)	Figures 2, 3, S7
sheep_number_adultmale	Of the ${sheep_number} sheep managed together at this compound, how many are adult males [Kati ya kondoo ${sheep_number} wanaotunzwa pamoja kwenye boma hili, ni wangapi madume wakubwa]?	(number)	Figures 2, 3, S7
sheep_number_adultfemale	Of the ${sheep_number} sheep managed together at this compound, how many are adult females [Kati ya ${sheep_number} kondoo wanaotunzwa pamoja kwenye boma hili, ni wangapi ni majike wakubwa]?	(number)	Figures 2, 3, S7
sheep_number_juvenile	Of the ${sheep_number} sheep managed together at this compound, how many are juveniles [Kati ya ${sheep_number} kondoo wanaotunzwa pamoja kwenye boma hili, ni wangapi wadogo]?	(number)	Figures 2, 3, S7
sheep_number_hh	Of the ${sheep_number} sheep currently managed together at this compound, how many are owned by your household [Kati ya ${sheep_number} kondoo wanaotunzwa pamoja kwa sasa katika boma hili, wangapi wanamilikiwa na kaya yako]?	(number)	Figures 2, 3, S7
cattle_ronjo	Are cattle from this compound regularly taken to seasonal camps for grazing [Je, ng'ombe wa boma hili wanapelekwa kwenye maboma ya muda kwa ajili ya malisho (ronjo)]?	Yes, No	Figure 4
goats_ronjo	Are goats from this compound regularly taken to seasonal camps for grazing [Je, mbuzi wa boma hili wanapelekwa kwenye maboma ya muda kwa ajili ya malisho (ronjo)]?	Yes, No	Figure 4
sheep_ronjo	Are sheep from this compound regularly taken to seasonal camps for grazing [Je, kondoo wa boma hili wanapelekwa kwenye maboma ya muda kwa ajili ya malisho (ronjo)]?	Yes, No	Figure 4
dogs	Dogs? [Mbwa]	Yes, No	Figure 4
cats	Cats [Paka]?	Yes, No	Figure 4
donkeys	Donkeys [Punda]?	Yes, No	Figure 4
pigs	Pigs [Nguruwe]?	Yes, No	Figure 4
chickens	Chickens [Kuku]?	Yes, No	Figure 4
birds	Other birds [Ndege wengine]?	Yes, No	Not used (see Methods)
other_animals	Other animals [Wanyama wengine]?	Yes, No	Not used (see Methods)
other_animals_type	What are these other animals [Ni wanyama gani hao]?	(free text)	Not used (see Methods)
graze_csg	Which of the following best describes the way you manage the herding of animals in this compound [Ipi kati yafuatayo inaeleza vizuri jinsi unavyotunza kundi la wanyama katika boma hili]:	Cattle, sheep and goats together Cattle with goats, sheep separately Cattle separately, sheep and goats together Cattle with sheep, goats separately All species separately	Figure 5
cattle_born	How many cattle were born in this compound in the past 12 months [Ng'ombe wangapi wamezaliwa katika boma hili katika miezi 12 iliyopita]?	(number)	Figure S8
cattle_intro	Have any cattle been introduced into this COMPOUND in the past 12 months? [Kuna ng'ombe yeyote aliyeliletwa katika kundi lenu kwa kipindi cha miezi 12 iliyopita]	Yes, No	Figure S6
cattle_sold	Have you sold any cattle out of your own herd in the past 12 months [Je, umeuza ng'ombe yoyote nje ya kundi lako katika miezi 12 iliyopita]?	Yes, No	Figure S6
cattle_out_nopay	Have you given away any cattle from your herd over the past 12 months [Je, umepeana ng'ombe kutoka kundi lako zaidi ya miezi 12 iliyopita]?	Yes, No	Figure S6
cattle_death	Have any cattle kept by your household died in the past 12 months (not through slaughter) [Kuna ng'ombe yoyote anayefugwa kwenye boma lako amekufa katika miezi 12 iliyopita (siyo kwa kuchinjwa)]?	Yes, No	Figure S6
goats_born	How many goats were born in this compound in the past 12 months [mbuzi wangapi wamezaliwa katika boma hili katika miezi 12 iliyopita]?	(number)	Figure S8
goats_intro	Have any goats been introduced into this COMPOUND in the past 12 months? [Kuna mbuzi yeyote aliyeliletwa katika kundi lenu kwa kipindi cha miezi 12 iliyopita]	Yes, No	Figure S6
goats_sold	Have you sold any goats out of your own herd in the past 12 months [Je, umeuza mbuzi yoyote nje ya kundi lako katika miezi 12 iliyopita]?	Yes, No	Figure S6
goats_out_nopay	Have you given away any goats from your herd over the past 12 months [Je, umepeana mbuzi kutoka kundi lako zaidi ya miezi 12 iliyopita]?	Yes, No	Figure S6
goats_death	Have any goats kept by your household died in the past 12 months (not through slaughter) [Kuna mbuzi yoyote anayefugwa kwenye boma lako amekufa katika miezi 12 iliyopita (siyo kwa kuchinjwa)]?	Yes, No	Figure S6
sheep_born	How many sheep were born in this compound in the past 12 months [kondoo wangapi wamezaliwa katika boma hili katika miezi 12 iliyopita]?	(number)	Figure S8
sheep_intro	Have any sheep been introduced into this COMPOUND in the past 12 months? [Kuna kondoo yeyote aliyeliletwa katika kundi lenu kwa kipindi cha miezi 12 iliyopita]	Yes, No	Figure S6
sheep_sold	Have you sold any sheep out of your own herd in the past 12 months [Je, umeuza kondoo yoyote nje ya kundi lako katika miezi 12 iliyopita]?	Yes, No	Figure S6
sheep_out_nopay	Have you given away any sheep from your herd over the past 12 months [Je, umepeana kondoo kutoka kundi lako zaidi ya miezi 12 iliyopita]?	Yes, No	Figure S6
sheep_death	Have any sheep kept by your household died in the past 12 months (not through slaughter) [Kuna kondoo yoyote anayefugwa kwenye boma lako amekufa katika miezi 12 iliyopita (siyo kwa kuchinjwa)]?	Yes, No	Figure S6
see_monkey	Do you see any of the following animals around your village during normal dry and wet seasons [Je, unaona wanyana wafuatao katika kijiji chako wakati wa kiangazi wa kawaida]? Small monkeys	Dry, Wet, Both, DryWet	Not used (see Methods)
see_baboons	Baboons	Dry, Wet, Both, DryWet	Not used (see Methods)
see_elephants	Elephants	Dry, Wet, Both, DryWet	Not used (see Methods)
see_zebra	Zebra	Dry, Wet, Both, DryWet	Not used (see Methods)
see_buffalo	Buffalo	Dry, Wet, Both, DryWet	Not used (see Methods)
see_antelope	Antelope	Dry, Wet, Both, DryWet	Not used (see Methods)
see_giraffe	Giraffe	Dry, Wet, Both, DryWet	Not used (see Methods)
see_wildebeest	Wildebeest	Dry, Wet, Both, DryWet	Not used (see Methods)
see_cats	Big cats (e.g. Lion, leopard)	Dry, Wet, Both, DryWet	Not used (see Methods)
see_wildpigs	Wild pigs (e.g bushpig, warthog)	Dry, Wet, Both, DryWet	Not used (see Methods)
confine_csg	Which of the following best describes the way you manage animals at night in this household [Ipi kati ya yafutatayo inaeleza vizuri jinsi unavyotunza wanyama wako katika kaya hii wakati wa usiku]:	Cattle, sheep and goats together Cattle with goats, sheep separately Cattle separately, sheep and goats together Cattle with sheep, goats separately All species separately	Not used (see Methods)
goats_water_samecattle	Are your goats taken to the same place as cattle for water [Je, mbuzi wako wanapelekwa sehemu moja wanakonyweshewa ng'ombe]?	Both: Yes, they are watered at the same place as cattle during both dry and wet seasons Wet: They are watered at the same place as cattle during the wet season, but different places during the dry season Dry: They are watered at the same place as cattle during dry season, but different places during the wet season Different: They are watered at different places to cattle during both dry and wet s…	Not used (see Methods)
sheep_water_samegoats	Are your sheep taken to the same place as goats for water during the dry and wet season [Je, kondoo wako wanapelekwa sehemu moja wanakonyweshewa mbuzi wakati wa kiangazi na masika]?	Both: Yes, they are watered at the same place as goats during both dry and wet seasons Wet: They are watered at the same place as goats during the wet season, but different places during the dry season Dry: They are watered at the same place as goats during dry season, but different places during the wet season Different: They are watered at different places to goats during both dry and wet seaso…	Not used (see Methods)
sheep_water_samecattle	Are your sheep taken to the same place as cattle for water during the dry and wet season [Je, kondoo wako wanapelekwa sehemu moja wanakonyweshewa ng'ombe wakati wa kiangazi na masika]?	Both: Yes, they are watered at the same place as cattle during both dry and wet seasons Wet: They are watered at the same place as cattle during the wet season, but different places during the dry season Dry: They are watered at the same place as cattle during dry season, but different places during the wet season Different: They are watered at different places to cattle during both dry and wet s…	Not used (see Methods)
cattle_freerange	How are cattle in this compound grazed during the wet and dry season [Unawalishaje ng'ombe wa boma hili kipindi cha mvua na kiangazi]? Free ranging (no herdsman)	Dry, Wet, Both, DryWet	Results (descriptive information only)
cattle_herded	Herded	Dry, Wet, Both, DryWet	Results (descriptive information only)
cattle_tethered	Tethered	Dry, Wet, Both, DryWet	Results (descriptive information only)
cattle_zero	Zero grazed	Dry, Wet, Both, DryWet	Results (descriptive information only)
goats_freerange	Free ranging (no herdsman)	Dry, Wet, Both, DryWet	Results (descriptive information only)
goats_herded	Herded	Dry, Wet, Both, DryWet	Results (descriptive information only)
goats_tethered	Tethered	Dry, Wet, Both, DryWet	Results (descriptive information only)
goats_zero	Zero grazed	Dry, Wet, Both, DryWet	Results (descriptive information only)
sheep_freerange	Free ranging (no herdsman)	Dry, Wet, Both, DryWet	Results (descriptive information only)
sheep_herded	Herded	Dry, Wet, Both, DryWet	Results (descriptive information only)
sheep_tethered	Tethered	Dry, Wet, Both, DryWet	Results (descriptive information only)
sheep_zero	Zero grazed	Dry, Wet, Both, DryWet	Results (descriptive information only)
cattle_intro_pay_origin	Where did you buy the ${cattle_intro_pay} cattle introduced into your household's herd [Kwa hao ng'ombe ${cattle_intro_pay} walionunuliwa walitokea wapi]?	Direct from another household Direct from market Livestock trader in this village (outside market) Livestock trader in another village (outside market) Don't know Other	Results (descriptive information only)
goats_intro_pay_origin	Where did you buy the ${goats_intro_pay} goats introduced into your household's herd [Kwa hao mbuzi ${goats_intro_pay} walionunuliwa walitokea wapi]?	Direct from another household Direct from market Livestock trader in this village (outside market) Livestock trader in another village (outside market) Don't know Other	Results (descriptive information only)
sheep_intro_pay_origin	Where did you buy the ${sheep_intro_pay} sheep introduced into your household's herd [Kwa hao kondoo ${sheep_intro_pay} walionunuliwa walitokea wapi]?	Direct from another household Direct from market Livestock trader in this village (outside market) Livestock trader in another village (outside market) Don't know Other	Results (descriptive information only)
cattle_sold_dest	Who were they sold to/how were they sold [Waliuzwa kwa nani/waliuzwaje]?	Direct to another household Direct to market Livestock trader in this village Livestock trader in another village Direct to slaughter place Other	Results (descriptive information only)
goats_sold_dest	Who were they sold to/how were they sold [Waliuzwa kwa nani/waliuzwaje]?	Direct to another household Direct to market Livestock trader in this village Livestock trader in another village Direct to slaughter place Other	Results (descriptive information only)
sheep_sold_dest	Who were they sold to/how were they sold [Waliuzwa kwa nani/waliuzwaje]?	Direct to another household Direct to market Livestock trader in this village Livestock trader in another village Direct to slaughter place Other	Results (descriptive information only)
graze_livestock_hhincompound	Do you routinely graze livestock owned by your household with those from the other ${hh_others_number} household(s) in this compound [Je, ni kawaida yako kuchunga/lisha mifugo yako (wa kaya yako) pamoja na mifugo wa kaya ${hh_others_number} wengine (kaya ndani ya boma hili)]?	Yes, No	Results (descriptive information only)
graze_livestock_othercompound	Do you routinely graze livestock owned in this compound with livestock from households outside this compound [Je, ni kawaida yako kuchunga/lisha mifugo ya boma hili pamoja na mifugo ya kaya nje ya boma hili]?	Yes, No	Results (descriptive information only)
livestock_elsewhere	Does your household own any cattle, goats or sheep that are currently kept elsewhere [Je, kaya yako inamiliki ng'ombe, mbuzi, au kondoo ambao wanatunzwa sehemu nyingine kwa sasa]?	Cattle, sheep, goats, none	Results (descriptive information only)
cattle_elsewhere_why	Why do you keep these cattle elsewhere [Kwanini unatunza hawa ng'ombe sehemu nyingine]?	On loan for breeding On loan for milk Lower disease risk Better grazing/forage availability Don’t know Favour between friends/family Other	Results (descriptive information only)
shoats_elsewhere_why	Why do you keep these sheep or goats elsewhere [Kwanini unatunza hawa kondoo au mbuzi sehemu nyingine]?	On loan for breeding On loan for milk Lower disease risk Better grazing/forage availability Don’t know Favour between friends/family Other	Results (descriptive information only)
cattle_number_elsewhere	How many cattle that your household owns are currently kept elsewhere [Ni ng'ombe wangapi ambao kaya yako inamiliki wanatunzwa sehemu nyingine kwa sasa]?	(number)	Results (descriptive information only)
goats_number_elsewhere	How many goats that your household owns are currently kept elsewhere [Ni mbuzi wangapi ambao kaya yako inamiliki wanatunzwa sehemu nyingine kwa sasa]?	(number)	Results (descriptive information only)
sheep_number_elsewhere	How many sheep that your household owns are currently kept elsewhere [Ni kondoo wangapi ambao kaya yako inamiliki wanatunzwa sehemu nyingine kwa sasa]?	(number)	Results (descriptive information only)
livestock_notowned	Are there currently any cattle, sheep or goats managed in this compound that are not owned by a person who lives here (e.g. animals on loan) [Je, kuna ng'ombe, kondoo, au mbuzi yoyote kwa sasa anatunzwa kwenye hili boma lakini hawamilikiwi na mtu yeyote anayeishi hapa]?	Cattle, sheep, goats, none	Results (descriptive information only)
cattle_number_notowned	How many cattle [Ng'ombe wangapi]?	(number)	Results (descriptive information only)
goats_number_notowned	How many goats [mbuzi wangapi]?	(number)	Results (descriptive information only)
sheep_number_notowned	How many sheep [kondoo wangapi]?	(number)	Results (descriptive information only)
cattle_notowned_why	Why are these cattle kept at this compound [Kwanini hawa ng'ombe wanafugwa katika hili boma]?	On loan for breeding On loan for milk Lower disease risk Better grazing/forage availability Don’t know Favour between friends/family Other	Results (descriptive information only)
shoats_notowned_why	Why are these sheep or goats kept at this compound [Kwanini hawa kondoo au mbuzi wanafugwa katika hili boma]?	On loan for breeding On loan for milk Lower disease risk Better grazing/forage availability Don’t know Favour between friends/family Other	Results (descriptive information only)
quarantine_cattle	What do you usually do when cattle are introduced into your herd [Kwa kawaida huwa unafanya nini wakati ng'ombe wanaletwa kwenye kundi lako]?	I mix them with my own animals straight away I ask (the previous owner) if there were any disease problems I separate them and observe them before introducing them to my own herd I vaccinate them I give them treatment Other	Results (descriptive information only)
quarantine_shoats	What do you usually do when sheep or goats are introduced into your herd [Kwa kawaida huwa unafanya nini wakati mbuzi au kondoo wanaletwa kwenye kundi lako]?	I mix them with my own animals straight away I ask (the previous owner) if there were any disease problems I separate them and observe them before introducing them to my own herd I vaccinate them I give them treatment Other	Results (descriptive information only)
